# Supplementary material
Source: publisher figshare collection journal article supplement (https://acs.figshare.com/ndownloader/files/4599142)
Supplement: Supplementary file 1 [file 4599142]

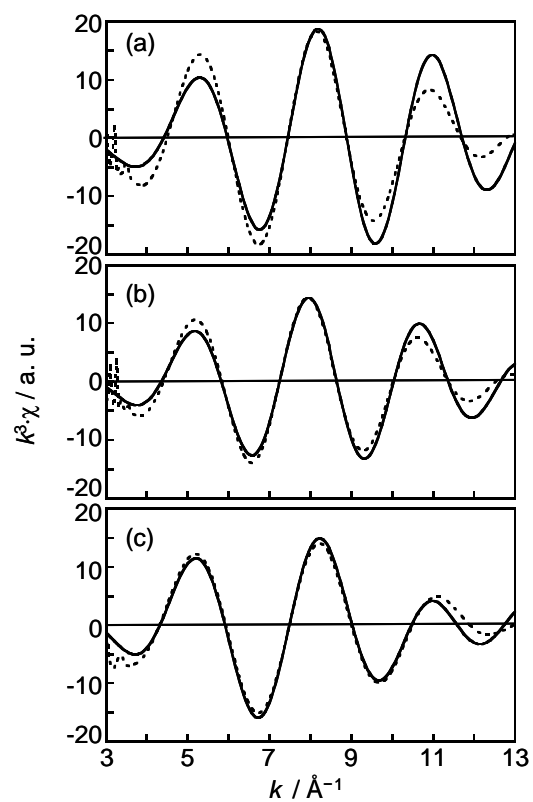

Figure S1

K-edge  $k^3$ -weighted EXAFS of  $(\text{La}_{0.8}\text{Ce}_{0.2})_2\text{O}_2\text{SO}_4$  after calcination at (a) 800 °C and (b) 900 °C, and (c)  $\text{La}_2\text{O}_2\text{SO}_4$  as a reference. The solid line and dotted lines represent experimental and fitted oscillation, respectively.
